# Supplementary material for: Unravelling the environmental degradation mechanism of perovskite thin films
Source: Royal Society of Chemistry journal article supplement (doi:10.1039/d4ma00574k), 2024-01-01
Supplement: d4ma00574k1.pdf [file d4ma00574k1.pdf]

## Supporting Information

### Unravelling the environmental degradation mechanism of perovskite thin films

*Nalini V.<sup>a,‡</sup>, Gergely N. Nagy<sup>b,‡</sup>, Ariful Rahamand, Sreeram K. Kalpathy<sup>e</sup>, Tiju Thomas<sup>e</sup>,  
Sumangala T. P.<sup>a,\*</sup>, Mousumi Upadhyay Kahaly<sup>b,c\*</sup>*

<sup>a</sup> Department of Physics, School of Advanced Sciences, Vellore Institute of Technology, Vellore, Tamil Nadu 632014, India

<sup>b</sup> ELI ALPS, ELI-HU Non-Profit Ltd., Wolfgang Sandner utca 3., Szeged, H-6728, Hungary

<sup>c</sup> Institute of Physics, University of Szeged, Dóm tér 9, H-6720, Szeged, Hungary

<sup>d</sup> Department of Manufacturing Engineering, School of Mechanical Engineering, Vellore, Institute of Technology, Vellore, Tamil Nadu 632014, India

<sup>e</sup> Department of Metallurgical and Materials Engineering, Indian Institute of Technology, Madras, Chennai, 600 036, Tamil Nadu, India

E-mail: sumangala.tp@vit.ac.in, Mousumi.upadhyaykahaly@eli-alps.hu

<sup>‡</sup> First two authors have equal contribution

\*sumangala.tp@vit.ac.in ; ORCID 0000-0003-4831-9099

\* Mousumi.upadhyaykahaly@eli-alps.hu

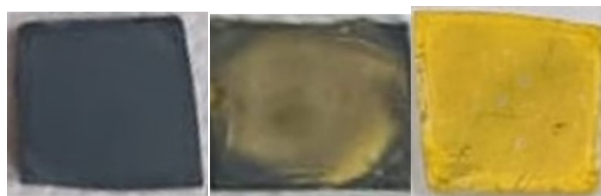

**Day 1**

**Day 11**

**Day 21**

**Fig. S1(a-c)** Digital photographs of MAPbI<sub>3</sub> films deposited on glass and stored under ambient conditions for several days. The black-colored film observed on day 1 corresponds to the fresh MAPbI<sub>3</sub> thin film. The formation of a yellow-colored film on day 21 corresponds to the experimentally observed PbI<sub>2</sub> phase after degradation.

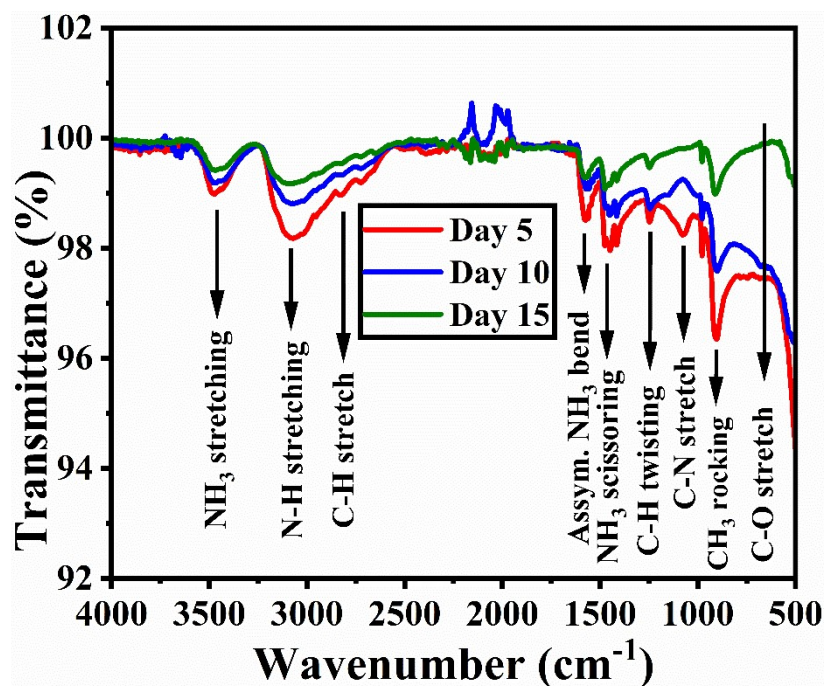

Fig. S2 FTIR spectra for degradation study at various intervals on MAPbI<sub>3</sub> thin film

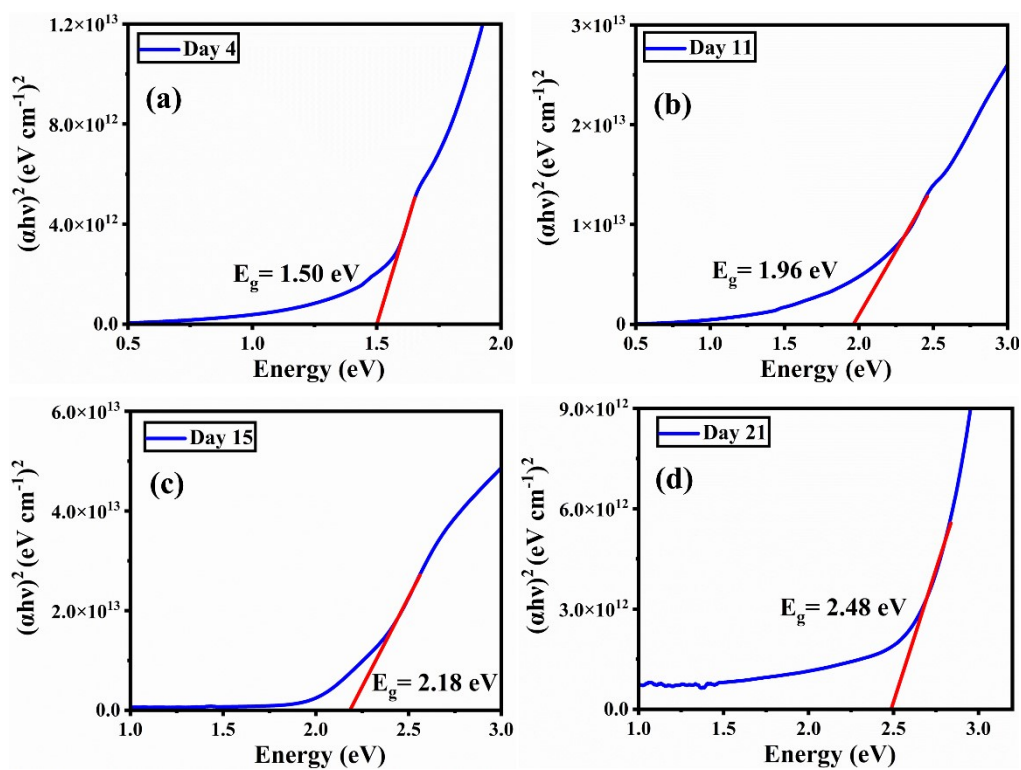

Fig. S3(a-d) Tauc's plot for MAPbI<sub>3</sub> aged thin films were obtained over a period of 21 days at regular intervals for day 4,11,15 and 21 under ambient conditions.

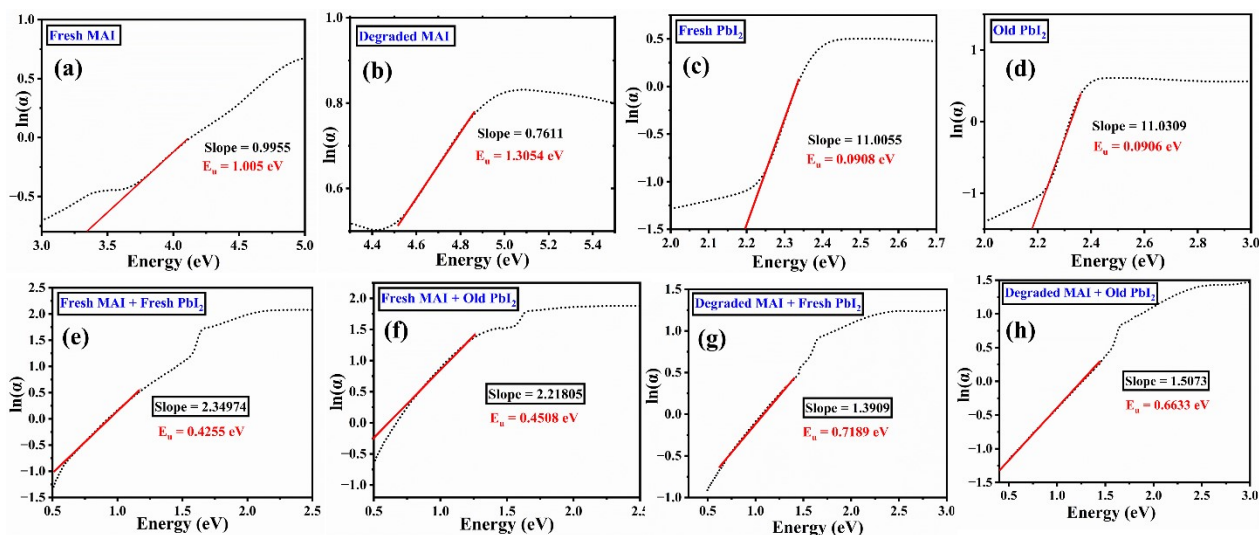

**Fig. S4** Urbach energy plot for fresh and old MAI and  $\text{PbI}_2$  powders and thin films. a. fresh MAI, b. degraded MAI, c. fresh  $\text{PbI}_2$ , d. old  $\text{PbI}_2$ , e. fresh MAI + fresh  $\text{PbI}_2$ , f. fresh MAI + old  $\text{PbI}_2$ , g. degraded MAI + fresh  $\text{PbI}_2$  and h. degraded MAI + old  $\text{PbI}_2$ .

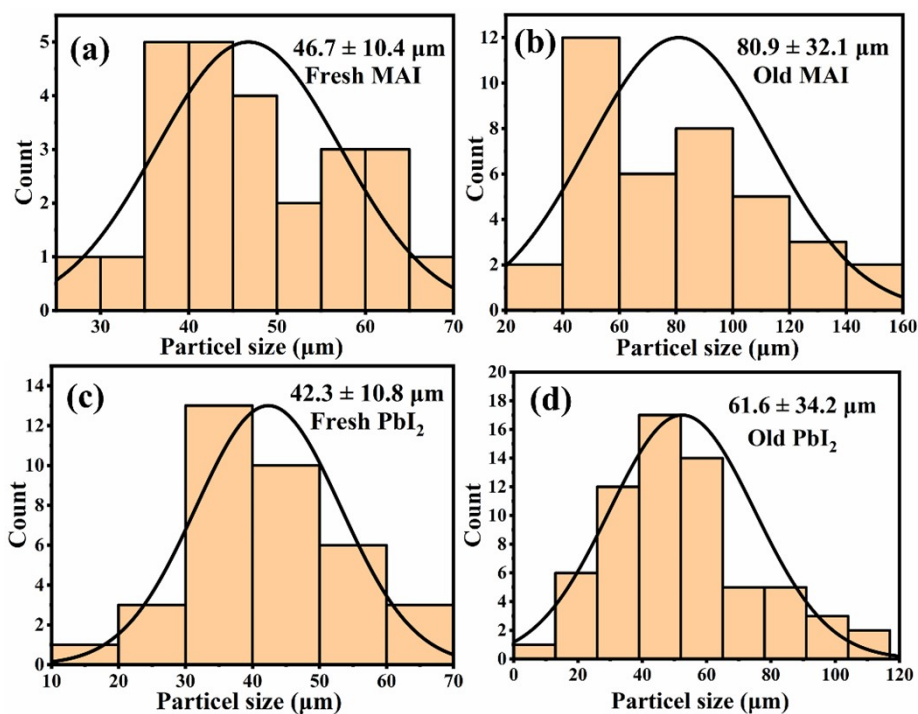

**Fig. S5** Histogram of particle size distributions of synthesized MAI and PbI<sub>2</sub> precursor powders were calculated for both fresh and old samples. (a) fresh MAI powder (b) old MAI powder, (c) fresh PbI<sub>2</sub> powder and (d) old PbI<sub>2</sub> powder

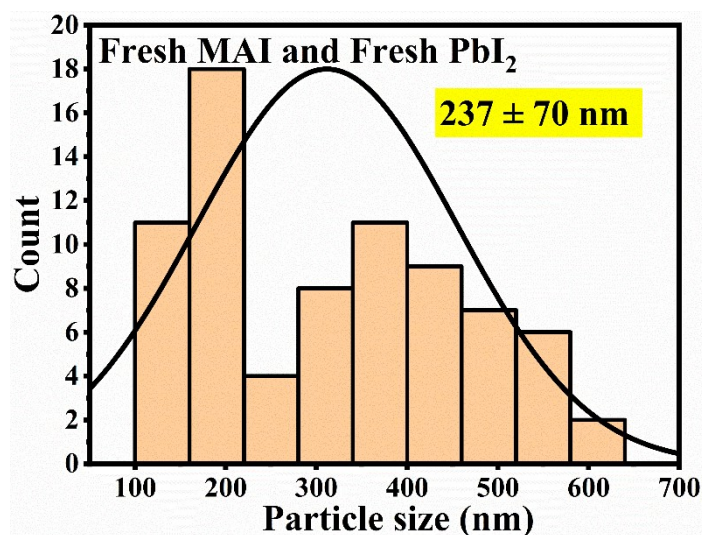

**Fig. S6** Using ImageJ software, a histogram of the grain size distributions for the freshly prepared MAPbI<sub>3</sub> thin film was calculated, showing an average grain size of ~ 237 nm.

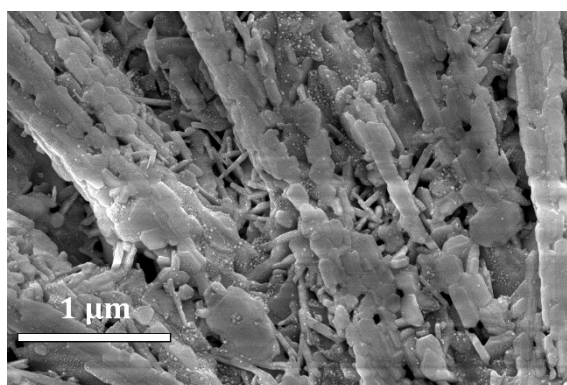

**Fig. S7** SEM image for the degraded MAPbI<sub>3</sub> thin film shows the flake-like structure with hexagonal morphology, which was obtained on day 21 when exposed to ambient conditions.



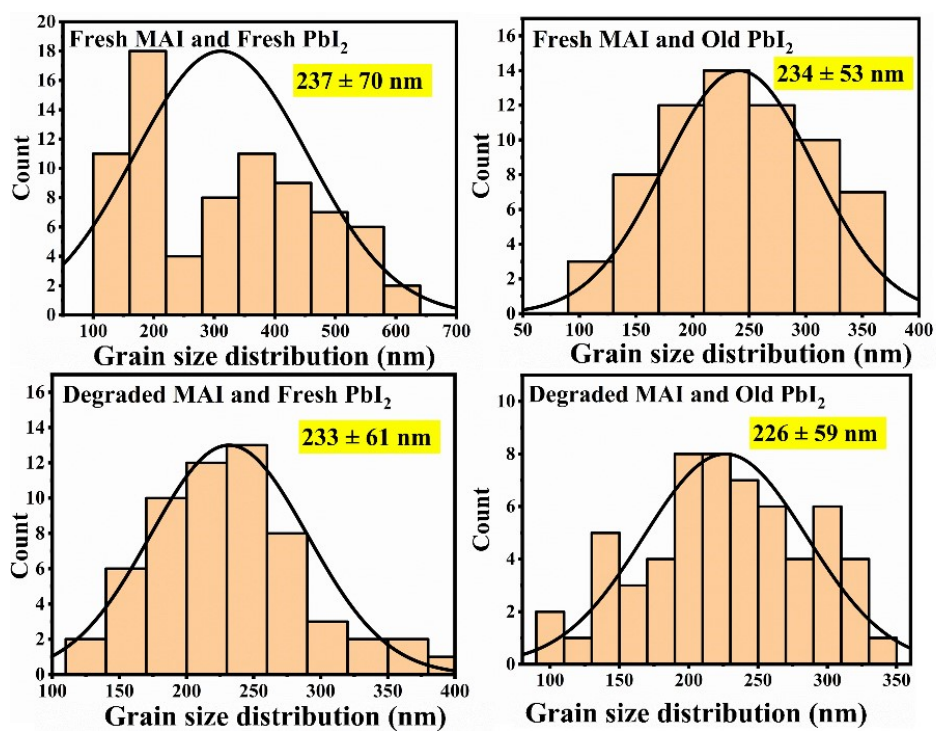

**Fig. S9** Using ImageJ software, a histogram of the grain size distributions for fresh and old MAI and PbI<sub>2</sub> powders. a. fresh MAI + fresh PbI<sub>2</sub>, b. fresh MAI + old PbI<sub>2</sub>, c. degraded MAI + fresh PbI<sub>2</sub> and d. degraded MAI + old PbI<sub>2</sub>.



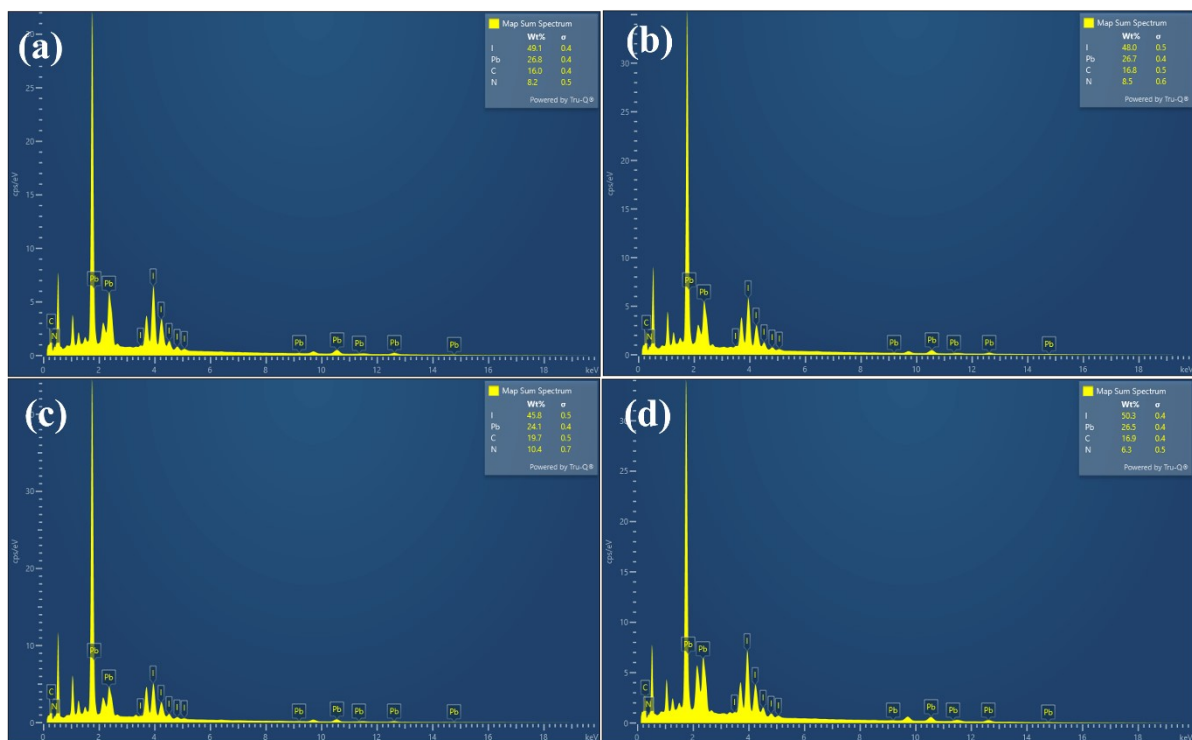

**Fig. S10** The elemental composition obtained from EDS spectrum for the thin films prepared using fresh and old MAI and  $\text{PbI}_2$  powders. (a). fresh MAI + fresh  $\text{PbI}_2$ , (b). fresh MAI + old  $\text{PbI}_2$ , (c). degraded MAI + fresh  $\text{PbI}_2$  and (d). degraded MAI + old  $\text{PbI}_2$

/
